# Supplementary material
Source: PubMed Central journal article supplement (PMC2913892)
Supplement: NIHMS220444-supplement-Supplemental_Materials_2.pdf [file NIHMS220444-supplement-Supplemental_Materials_2.pdf]

## Supplementary Table 2

|                                                                       | Fold Change    |        |                |        | GenBank # | Fold Change    |        |                |        | GenBank # |
|-----------------------------------------------------------------------|----------------|--------|----------------|--------|-----------|----------------|--------|----------------|--------|-----------|
|                                                                       | HMGA1a         |        | HMGA1b         |        |           | HMGA1a         |        | HMGA1b         |        |           |
|                                                                       | $\beta$ -actin | myosin | $\beta$ -actin | myosin |           | $\beta$ -actin | myosin | $\beta$ -actin | myosin |           |
| <b>Up-Regulated Genes</b>                                             |                |        |                |        |           |                |        |                |        |           |
| <b>General Metabolism</b>                                             |                |        |                |        |           |                |        |                |        |           |
| <i>Superoxide dismutase 1</i>                                         | 19.2           | 23.3   | 15             | 15.3   | Y00404    |                |        |                |        |           |
| <i>Cytochrome c oxidase subunit IV</i>                                | 11.5           | 14     | 22.4           | 22.7   | X14209    |                |        |                |        |           |
| <i>COX1</i>                                                           | 11.2           | 13.6   | 8              | 8.2    | S79304    |                |        |                |        |           |
| <i>NADP+ alcohol dehydrogenase</i>                                    | 9.2            | 11.2   | 17.3           | 17.6   | D10854    |                |        |                |        |           |
| <i>Pancreatic triacylglycerol lipase</i>                              | 4.3            | 5.2    |                |        | M58369    |                |        |                |        |           |
| <i>Glutathione S-transferase P subunit</i>                            | 4.1            | 5      | 3.5            | 3.5    | X02904    |                |        |                |        |           |
| <i>Cytochrome c oxidase Vb</i>                                        | 3.9            | 4.8    | 7.3            | 7.4    | D10952    |                |        |                |        |           |
| <i>Glutathione S-transferase Yb2 subunit</i>                          | 3.4            | 4.2    | 2.7            | 2.8    | J02592    |                |        |                |        |           |
| <i>COX5a</i>                                                          | 3.3            | 4      | 7.8            | 7.9    | X15030    |                |        |                |        |           |
| <i>ATPase subunit F, vacuolar</i>                                     | 2.8            | 3.4    |                |        | U43175    |                |        |                |        |           |
| <i>Acetylcholinesterase</i>                                           | 2.5            | 3      | 4.7            | 4.8    | S50879    |                |        |                |        |           |
| <i>ATP synthase, subunit c, P2 gene</i>                               | 2.4            | 2.9    |                |        | D13124    |                |        |                |        |           |
| <i>Aldolase A, fructose-bisphosphate</i>                              | 2.2            | 2.7    |                |        | M12919    |                |        |                |        |           |
| <i>Dopamine beta-hydroxylase</i>                                      | 2.1            | 2.6    | 3.9            | 4      | L12407    |                |        |                |        |           |
| <i>ATP5G1</i>                                                         | 2.1            | 2.5    | 4              | 4      | D13123    |                |        |                |        |           |
| <i>Mitochondrial ATP synthase B subunit</i>                           | 2              | 2.4    |                |        | M35052    |                |        |                |        |           |
| <i>Acyl Coenzyme A dehydrogenase, long chain</i>                      |                |        | 6.2            | 6.3    | J05029    |                |        |                |        |           |
| <i>Cytochrome P-450 2J3</i>                                           |                |        | 3.6            | 3.6    | U39943    |                |        |                |        |           |
| <i>Pancreatic lipase</i>                                              |                |        | 3.4            | 3.4    | L09216    |                |        |                |        |           |
| <i>Mitochondrial ATP synthase beta subunit</i>                        |                |        | 3.2            | 3.3    | M19044    |                |        |                |        |           |
| <i>liver/heart cytochrome c oxidase polypeptide VIIa</i>              |                |        | 3              | 3      | X54080    |                |        |                |        |           |
| <i>Glutathione S-transferase alpha 3</i>                              |                |        | 2.7            | 2.7    | X62660    |                |        |                |        |           |
| <i>Annexin I</i>                                                      |                |        | 2.5            | 2.5    | M19967    |                |        |                |        |           |
| <i>Olfactory cytochrome P450 IIIA9</i>                                |                |        | 2.4            | 2.4    | U60085    |                |        |                |        |           |
| <i>Nitric oxide synthase 3</i>                                        |                |        | 2.3            | 2.4    | U02534    |                |        |                |        |           |
| <i>Very long chain acyl-CoA dehydrogenase</i>                         |                |        | 2.2            | 2.3    | D30647    |                |        |                |        |           |
| <i>Aldehyde dehydrogenase 3</i>                                       |                |        | 2.1            | 2.2    | M73714    |                |        |                |        |           |
| <i>Mitochondrial ATP synthase D subunit</i>                           |                |        | 2.1            | 2.1    | D10021    |                |        |                |        |           |
| <b>Ribosomal Proteins (RP)</b>                                        |                |        |                |        |           |                |        |                |        |           |
| <i>RPL19</i>                                                          | 6.9            | 8.3    | 28.8           | 29.3   | J02650    |                |        |                |        |           |
| <i>RPS19</i>                                                          | 5              | 6      | 23.1           | 23.4   | X51707    |                |        |                |        |           |
| <i>RPL13</i>                                                          | 4.9            | 6      | 8.2            | 8.3    | X78327    |                |        |                |        |           |
| <i>RPS3a</i>                                                          | 4.5            | 5.5    | 2.4            | 2.4    | M84716    |                |        |                |        |           |
| <i>RPL21</i>                                                          | 4.1            | 5      | 15             | 15.2   | M27905    |                |        |                |        |           |
| <i>RPS17</i>                                                          | 4              | 4.9    |                |        | K02933    |                |        |                |        |           |
| <i>RPS12</i>                                                          | 3.4            | 4.2    | 2.8            | 2.8    | M18547    |                |        |                |        |           |
| <i>RPL36a</i>                                                         | 2.8            | 3.4    |                |        | M19635    |                |        |                |        |           |
| <i>RPL11</i>                                                          | 2.3            | 2.8    | 5.3            | 5.3    | X62146    |                |        |                |        |           |
| <i>RPS11</i>                                                          | 2.1            | 2.5    | 9.5            | 9.6    | K03250    |                |        |                |        |           |
| <i>RPL12</i>                                                          |                |        | 6.7            | 6.8    | X53504    |                |        |                |        |           |
| <i>RPL10</i>                                                          |                |        | 2.6            | 2.7    | X87106    |                |        |                |        |           |
| <i>RPS4x</i>                                                          |                |        | 2.3            | 2.4    | X14210    |                |        |                |        |           |
| <b>Growth Factors/Cytokines &amp; Chemokines</b>                      |                |        |                |        |           |                |        |                |        |           |
| <i>Glia maturation factor <math>\beta</math></i>                      | 9.2            | 11.1   | 6.2            | 6.2    | Z11558    |                |        |                |        |           |
| <i>Macrophage migration inhibitory factor</i>                         | 5.1            | 6.1    | 4.5            | 4.6    | U62326    |                |        |                |        |           |
| <i>Macrophage inflammatory protein 2</i>                              | 3.8            | 4.6    | 34.2           | 34.6   | U45965    |                |        |                |        |           |
| <i><math>\beta</math>-nerve growth factor, <math>\beta</math>-NGF</i> | 3.5            | 4.2    | 2.2            | 2.2    | M36589    |                |        |                |        |           |
| <i>Endothelin receptor ET-B</i>                                       | 3.2            | 3.9    |                |        | X57764    |                |        |                |        |           |
| <i>C5a anaphylatoxin chemotactic receptor</i>                         | 2.7            | 3.3    |                |        | AB003042  |                |        |                |        |           |
| <i>Neogenin</i>                                                       | 2.5            | 3.1    |                |        | U68726    |                |        |                |        |           |
| <i>LCR-1; putative chemokine</i>                                      | 2.5            | 3      |                |        | U54791    |                |        |                |        |           |
| <i>CXC chemokine LIX</i>                                              | 2.3            | 2.8    |                |        | U90448    |                |        |                |        |           |
| <i>Transforming growth factor, <math>\beta</math> 3</i>               | 2              | 2.4    |                |        | U03491    |                |        |                |        |           |
| <i>Granulocyte-macrophage colony-stimulating factor</i>               |                |        | 7.4            | 7.5    | U00620    |                |        |                |        |           |
| <i>PDGFA</i>                                                          |                |        | 3.6            | 3.7    | L06894    |                |        |                |        |           |
| <b>Oncogenes/Proto-oncogenes</b>                                      |                |        |                |        |           |                |        |                |        |           |
| <i>v-erb-B2</i>                                                       | 4.9            | 5.9    | 5.6            | 5.7    | X03362    |                |        |                |        |           |
| <i>N-ras</i>                                                          | 4.3            | 5.3    | 3.5            | 3.5    | X68394    |                |        |                |        |           |
| <i>N-myc</i>                                                          | 3.4            | 4.1    | 2.8            | 2.9    | X63281    |                |        |                |        |           |
| <i>H-ras</i>                                                          | 2.9            | 3.6    |                |        | M13011    |                |        |                |        |           |
| <i>c-akt</i>                                                          | 2.8            | 3.4    |                |        | D30040    |                |        |                |        |           |
| <i>c-mos</i>                                                          | 2.6            | 3.2    |                |        | X52952    |                |        |                |        |           |
| <i>c-fos</i>                                                          | 2.3            | 2.8    | 3.7            | 3.8    | X06769    |                |        |                |        |           |
| <i>A-RAF</i>                                                          | 2.1            | 2.5    |                |        | X06942    |                |        |                |        |           |
| <b>Hormone Receptors</b>                                              |                |        |                |        |           |                |        |                |        |           |
| <i>Growth hormone receptor</i>                                        | 2.4            | 2.9    |                |        | J04811    |                |        |                |        |           |
| <i>Serotonin receptor</i>                                             | 2.6            | 3.2    |                |        | L03202    |                |        |                |        |           |
| <i>Insulin receptor</i>                                               | 2              | 2.4    |                |        | M29014    |                |        |                |        |           |
| <i>Tachykinin substance P</i>                                         | 2.7            | 3.3    |                |        | M31477    |                |        |                |        |           |
| <i>Estrogen receptor <math>\beta</math></i>                           | 2.8            | 3.4    |                |        | U57439    |                |        |                |        |           |
| <i>Insulin receptor 1</i>                                             | 4.2            | 5.1    |                |        | X58375    |                |        |                |        |           |
| <b>Cell Surface Antigens</b>                                          |                |        |                |        |           |                |        |                |        |           |
| <i>Peripheral myelin protein</i>                                      | 2.2            | 2.6    |                |        | M69139    |                |        |                |        |           |
| <i>Glypican 1</i>                                                     |                |        | 3.6            | 3.7    | L34067    |                |        |                |        |           |
| <i>Protocadherin 4</i>                                                |                |        | 3.8            | 3.8    | AB004276  |                |        |                |        |           |
| <i>Syndecan 3</i>                                                     |                |        | 3.4            | 3.5    | U52825    |                |        |                |        |           |
| <i>CD44 antigen; phagocytic glycoprotein 1</i>                        |                |        | 2              | 2.1    | M61875    |                |        |                |        |           |
| <i>PLAUR</i>                                                          |                |        | 2.2            | 2.3    | X71899    |                |        |                |        |           |
| <b>Growth Factor &amp; Chemokine Receptors</b>                        |                |        |                |        |           |                |        |                |        |           |
| <i>LGF2R</i>                                                          | 2.4            | 2.9    |                |        | U59809    |                |        |                |        |           |
| <b>Up-Regulated Genes</b>                                             |                |        |                |        |           |                |        |                |        |           |
| <b>Growth Factor &amp; Chemokine Receptors (cont.)</b>                |                |        |                |        |           |                |        |                |        |           |
| <i>Ephrin type-A receptor 7</i>                                       |                |        |                |        |           |                |        | 3.6            | 3.6    | U21954    |
| <i>TNFRSF1A</i>                                                       |                |        |                |        |           |                |        | 2.5            | 2.6    | M63122    |
| <i>Rat embryo tyrosine-protein kinase 4</i>                           |                |        |                |        |           |                |        | 2.5            | 2.5    | U69278    |
| <i>Fibroblast growth factor receptor 4</i>                            |                |        |                |        |           |                |        | 2.4            | 2.4    | M91599    |
| <i>RET ligand 2</i>                                                   |                |        |                |        |           |                |        | 2.1            | 2.2    | U97143    |
| <b>Other Receptors (by Ligands)</b>                                   |                |        |                |        |           |                |        |                |        |           |
| <i>Glycine receptor <math>\alpha</math> 1 subunit</i>                 |                |        |                |        |           | 4              | 4.9    |                |        | D00833    |
| <i>Metabotropic glutamate receptor 5</i>                              |                |        | 3.3            | 4      |           |                |        | 4.8            | 4.9    | D10891    |
| <i>Transferrin receptor</i>                                           |                |        | 2.5            | 3      |           |                |        |                |        | M58040    |
| <i>Metabotropic glutamate receptor 1</i>                              |                |        | 2.4            | 2.9    |           |                |        |                |        | M61099    |
| <i>Transmembrane receptor unc5 homolog 1</i>                          |                |        |                |        |           |                |        | 3.7            | 3.8    | U87305    |
| <i>Transmembrane receptor unc5 homolog 2</i>                          |                |        |                |        |           |                |        | 2.7            | 2.7    | U87306    |
| <b>Transcription Repressors</b>                                       |                |        |                |        |           |                |        |                |        |           |
| <i>RLIF-1</i>                                                         |                |        | 3.2            | 3.9    |           |                |        | 2.4            | 2.5    | X63594    |
| <i>Id3</i>                                                            |                |        | 3.1            | 3.8    |           |                |        | 2.8            | 2.9    | D10864    |
| <i>Id1</i>                                                            |                |        | 2.7            | 3.3    |           |                |        | 3              | 3      | D10862    |
| <i>Id2</i>                                                            |                |        | 2.3            | 2.7    |           |                |        | 2              | 2      | D10863    |
| <b>Other Immune System Proteins</b>                                   |                |        |                |        |           |                |        |                |        |           |
| <i>T-cell receptor <math>\gamma</math> cluster</i>                    |                |        |                |        |           | 3.8            | 4.6    | 4              | 4.1    | D55648    |
| <i>Transitional endoplasmic reticulum type ATPase</i>                 |                |        | 2.1            | 2.5    |           | 2.5            | 2.5    | 2.5            | 2.5    | U11760    |
| <i>Lymphocyte antigen CD5</i>                                         |                |        |                |        |           |                |        | 5.6            | 5.7    | D10728    |
| <i>B7.1</i>                                                           |                |        |                |        |           |                |        | 3.1            | 3.2    | AF010465  |
| <b>Proteasomal Proteins</b>                                           |                |        |                |        |           |                |        |                |        |           |
| <i>Proteasome delta subunit</i>                                       |                |        | 2.3            | 2.8    |           |                |        | 3.6            | 3.7    | D10754    |
| <i>Proteasome subunit alpha type 1</i>                                |                |        | 2              | 2.4    |           |                |        | 2              | 2      | M29859    |
| <i>Proteasome beta subunit</i>                                        |                |        |                |        |           |                |        | 2              | 2.1    | L17127    |
| <i>Proteasome iota subunit</i>                                        |                |        |                |        |           |                |        | 2              | 2      | D10755    |
| <b>Nucleotide Metabolism</b>                                          |                |        |                |        |           |                |        |                |        |           |
| <i>Cytosolic thymidine kinase</i>                                     |                |        | 8.9            | 10.8   |           | 46.5           | 47.2   |                |        | M22642    |
| <i>Nucleosidase diphosphate kinase B</i>                              |                |        | 3.5            | 4.2    |           |                |        |                |        | M91597    |
| <i>Nucleoside diphosphate kinase A</i>                                |                |        | 3.2            | 3.9    |           |                |        | 8              | 8.1    | D13374    |
| <i>Adenylate kinase 3</i>                                             |                |        |                |        |           |                |        | 4.6            | 4.7    | D13062    |
| <b>Chaperones &amp; Heat Shock Proteins</b>                           |                |        |                |        |           |                |        |                |        |           |
| <i>Heat shock 90-kDa protein <math>\beta</math></i>                   |                |        | 7.1            | 8.6    |           |                |        | 3              | 3.1    | S45392    |
| <i>Heat shock 27-kDa protein <math>\beta</math></i>                   |                |        | 6.4            | 7.8    |           |                |        |                |        | M86389    |
| <i>Heat shock 60-kDa protein</i>                                      |                |        | 2              | 2.4    |           |                |        |                |        | X54793    |
| <i>Heat shock 70-kDa protein <math>\beta</math></i>                   |                |        |                |        |           |                |        | 2              | 2      | Z27118    |
| <b>Ligand-Gated Ion Channel</b>                                       |                |        |                |        |           |                |        |                |        |           |
| <i>Acetylcholine receptor <math>\beta</math></i>                      |                |        | 4.3            | 5.2    |           |                |        |                |        | X74833    |
| <i>P2X purinoceptor 4</i>                                             |                |        | 3.3            | 4      |           |                |        |                |        | X80477    |
| <i>Gamma-aminobutyric acid receptor <math>\beta</math> 1</i>          |                |        | 2              | 2.4    |           |                |        |                |        | X15466    |
| <b>Intracellular Transducers, Effectors &amp; Modulators</b>          |                |        |                |        |           |                |        |                |        |           |
| <i>STAT3</i>                                                          |                |        | 2.5            | 3.1    |           |                |        | 2.9            | 3      | X91810    |
| <i>ADP-ribosylation factor 5</i>                                      |                |        |                |        |           |                |        | 5.3            | 5.3    | L12384    |
| <i>ADP-ribosylation factor 6</i>                                      |                |        |                |        |           |                |        | 2              | 2.1    | L12385    |
| <b>Neuropeptides</b>                                                  |                |        |                |        |           |                |        |                |        |           |
| <i>Neuropeptide Y</i>                                                 |                |        | 3.9            | 4.7    |           |                |        |                |        | M20373    |
| <i>Tachykinin</i>                                                     |                |        | 2.7            | 3.4    |           |                |        | 10.2           | 10.3   | M34184    |
| <i>Prepronociceptin (neuropeptide nociceptin)</i>                     |                |        |                |        |           |                |        | 4.1            | 4.1    | X97375    |
| <b>Other Enzymes Involved in Protein Turnover</b>                     |                |        |                |        |           |                |        |                |        |           |
| <i>Plasma glutathione peroxidase</i>                                  |                |        | 4.7            | 5.7    |           |                |        |                |        | D00680    |
| <i>Testosterone-repressed prostate message 2</i>                      |                |        | 2              | 2.4    |           |                |        | 8.8            | 8.9    | M64723    |
| <i>Type I procollagen C proteinase enhancer protein</i>               |                |        |                |        |           |                |        | 2              | 2      | U94710    |
| <b>Xenobiotic Metabolism</b>                                          |                |        |                |        |           |                |        |                |        |           |
| <i>Microsomal glutathione S-transferase 1</i>                         |                |        | 3              | 3.7    |           |                |        | 2              | 2      | J03752    |
| <i>Epididymal secretory glutathione peroxidase</i>                    |                |        | 2.1            | 2.6    |           |                |        |                |        | X62404    |
| <i>Glutathione peroxidase 4</i>                                       |                |        |                |        |           |                |        | 2.5            | 2.5    | X82679    |
| <b>Intracellular Kinase Network Members</b>                           |                |        |                |        |           |                |        |                |        |           |
| <i>Male germ-cell associated kinase</i>                               |                |        | 3.1            | 3.8    |           |                |        | 2.4            | 2.4    | M35862    |
| <i>LIM domain kinase 1</i>                                            |                |        | 2.1            | 2.6    |           |                |        | 2.2            | 2.2    | D31873    |
| <b>Phospholipases &amp; Phosphoinositol Kinases</b>                   |                |        |                |        |           |                |        |                |        |           |
| <i>Phospholipase C <math>\delta</math> 4</i>                          |                |        | 3.7            | 4.5    |           |                |        |                |        | D50455    |
| <i>Interferon <math>\gamma</math>-induced protein 10</i>              |                |        | 2.9            | 3.5    |           |                |        | 2.1            | 2.2    | U17035    |
| <b>Symporters &amp; Antiporters</b>                                   |                |        |                |        |           |                |        |                |        |           |
| <i>Solute carrier family 6 member 11</i>                              |                |        | 7              | 8.5    |           |                |        | 7.7            | 7.8    | M95738    |
| <i>SLC23A5</i>                                                        |                |        |                |        |           |                |        |                |        |           |

|                                                                          | Fold Change    |        |                |        | GenBank # |
|--------------------------------------------------------------------------|----------------|--------|----------------|--------|-----------|
|                                                                          | <u>HMGA1a</u>  |        | <u>HMGA1b</u>  |        |           |
|                                                                          | $\beta$ -actin | myosin | $\beta$ -actin | myosin |           |
| <b><u>Up-Regulated Genes</u></b>                                         |                |        |                |        |           |
| <b><u>DNA Polymerases, Replication Factors, &amp; Topoisomerases</u></b> |                |        |                |        |           |
| <i>Proliferating cell nuclear antigen</i>                                | 3.7            | 4.4    | 4.7            | 4.7    | Y00047    |
| <b><u>Major Histocompatibility Complex Proteins</u></b>                  |                |        |                |        |           |
| <i><math>\beta</math>-2-microglobulin</i>                                | 3.7            | 4.5    | 4.3            | 4.4    | X16956    |
| <b><u>Protease Inhibitors</u></b>                                        |                |        |                |        |           |
| <i>Tissue inhibitor of metalloproteinase 2</i>                           | 2.8            | 3.4    | 5.8            | 5.9    | L31884    |
| <b><u>Tumor Suppressors</u></b>                                          |                |        |                |        |           |
| <i>Deleted in Colorectal Cancer</i>                                      | 8.9            | 10.8   | 3              | 3.1    | U68725    |
| <b><u>G Protein-Coupled Receptors</u></b>                                |                |        |                |        |           |
| <i>G protein coupled receptor, putative</i>                              | 2.1            | 2.5    |                |        | U12006    |
| <b><u>Other Cytoskeleton &amp; Motility Proteins</u></b>                 |                |        |                |        |           |
| <i>Non-muscle cofilin</i>                                                | 2.3            | 2.8    |                |        | X62908    |
| <b><u>Translation Factors</u></b>                                        |                |        |                |        |           |
| <i>Elongation factor 2</i>                                               | 2              | 2.5    |                |        | K03502    |
| <b><u>Apoptosis-Associated Proteins</u></b>                              |                |        |                |        |           |
| <i>Activator of apoptosis harakiri</i>                                   |                |        | 3.9            | 4      | D83697    |
| <b><u>Cyclins</u></b>                                                    |                |        |                |        |           |
| <i>Cyclin D3</i>                                                         |                |        | 2.5            | 2.6    | D16309    |
| <b><u>Exocytosis Proteins</u></b>                                        |                |        |                |        |           |
| <i>Lipocortin 2</i>                                                      |                |        | 2.2            | 2.3    | S73557    |
| <b><u>Functionally Unclassified Proteins</u></b>                         |                |        |                |        |           |
| <i>Prothymosin-alpha</i>                                                 |                |        | 2.5            | 2.5    | M20035    |
| <b><u>Metalloproteinases</u></b>                                         |                |        |                |        |           |
| <i>Glutamyl aminopeptidase</i>                                           |                |        | 2.9            | 3      | S73583    |
| <b><u>Protein Modification Enzymes</u></b>                               |                |        |                |        |           |
| <i>Cytochrome P450 reductase</i>                                         |                |        | 2.1            | 2.1    | M12516    |
| <b><u>Protein Phosphatase Receptors</u></b>                              |                |        |                |        |           |
| <i>PTPLB</i>                                                             |                |        | 2.5            | 2.6    | D38222    |
| <b><u>Voltage-Gated Ion Channels</u></b>                                 |                |        |                |        |           |
| <i>Annexin V</i>                                                         |                |        | 2.2            | 2.2    | M21730    |
| <b><u>Down-Regulated Genes</u></b>                                       |                |        |                |        |           |
| <b><u>Other Immune System Proteins</u></b>                               |                |        |                |        |           |
| <i>CD3 gamma subunit</i>                                                 | 4.2            | 5.1    | 3.6            | 3.7    | S79711    |
| <b><u>Ligand-Gated Ion Channel</u></b>                                   |                |        |                |        |           |
| <i>GABRR1</i>                                                            | 13.7           | 16.6   | 3.3            | 3.4    | X95579    |
